# Supplementary material for: Whole-Transcriptome Sequence of Degenerative Meniscus Cells Unveiling Diagnostic Markers and Therapeutic Targets for Osteoarthritis
Source: Front Genet. 2021 Oct 15;12:754421. doi: 10.3389/fgene.2021.754421 (PMC8554121; doi:10.3389/fgene.2021.754421)
Supplement: Supplementary file 6 [file Table1.XLSX]

## Sheet: sheet1
AccID	log2FC	FoldChange	FDR	Normalized_OA_IL-1b	Normalized_OA_NC	Style	OA004_IL-1b	OA006_IL-1b	OA008_IL-1b	OA004_NC	OA006_NC	OA008_NC
hsa-miR-155-5p	1.05718	2.08086	1.63276e-06	37443.2	17994.1	up	28955	46583	56103	9575	25531	15668
hsa-miR-3065-5p	-1.03838	0.486873	0.00631113	40.1923	82.5625	down	38	38	65	41	125	70
hsa-miR-212-5p	1.77359	3.41904	0	105.645	30.8919	up	97	96	182	17	40	29
hsa-miR-147b-5p	5.52648	46.0931	0	117.456	2.53845	up	95	153	158	0	5	3
hsa-miR-429	2.19561	4.58083	0.0386178	92.5475	20.1954	up	114	53	151	22	13	14
hsa-miR-184	5.23536	37.6705	0.0331177	101.082	2.67359	up	2	9	467	1	5	2
hsa-miR-200b-3p	2.34162	5.06871	0.00033104	1439.65	284.019	up	1715	1037	2144	307	175	206
hsa-miR-5588-5p	1.25666	2.38943	0.0480835	60.8592	25.4644	up	67	58	80	13	28	29
hsa-miR-146a-5p	3.92986	15.2407	3.11491e-09	41181.2	2702.04	up	36792	56695	44349	1081	2492	3841
hsa-miR-129-2-3p	2.0135	4.03759	5.29356e-08	68.49	16.9555	up	69	68	98	10	34	6
hsa-miR-147b-3p	2.65234	6.28685	1.32315e-07	356.684	56.7266	up	244	360	718	15	130	33
hsa-miR-206	5.05123	33.1566	0.0345667	343.593	10.353	up	7	11	1616	7	12	9
hsa-miR-200a-5p	3.06387	8.36214	0.0468842	39.1192	4.66933	up	54	21	55	6	3	2
hsa-miR-129-5p	2.0685	4.19452	0.0445832	462.354	110.22	up	567	371	602	76	185	51
